# Supplementary material for: Distinct type I and type II toxin-antitoxin modules control Salmonella lifestyle inside eukaryotic cells
Source: PubMed Central journal article supplement (PMC4366850; doi:10.1038/srep09374), 2015-03-20
Supplement: srep09374-s1.pdf [file srep09374-s1.pdf]

## SUPPLEMENTARY INFORMATION

Distinct type I and type II toxin-antitoxin modules control *Salmonella* lifestyle inside eukaryotic cells

*Damián Lobato-Márquez, Inmaculada Moreno-Córdoba, Virginia Figueroa,*

*Ramón Díaz-Orejas & Francisco García-del Portillo*

[Supplementary Table S1](#). Compiled information of the 27 TA modules characterized in *S. Typhimurium* strain SL1344.

[Supplementary Table S2](#). Components of known TA modules used as PSI-BLAST queries.

[Supplementary Fig. S1](#): Production of toxins and antitoxins encoded by type I and type II TA modules exhibiting no activity in functional assays.

[Supplementary Fig. S2](#): Recovery by site directed mutagenesis of anti-proliferative activity in the non-functional toxins CCdB<sub>ST</sub> and PasT<sub>ST</sub> of *S. Typhimurium* strain SL1344.

[Supplementary Fig. S3](#): Control experiments discard polar effects due to genetic procedure involving replacement of functional TA loci.

[Supplementary Fig. S4](#): Invasion rate of two fibroblast cell lines (BJ5ta and NRK-49F) and an epithelial cell line (HeLa) shown by *S. Typhimurium* strains lacking *bona fide* type I and type II TA modules.

[Supplementary Fig. S5](#): Growth curves in LB medium of defined *S. Typhimurium* mutants lacking type I and type II TA modules required for survival inside eukaryotic cells.

[Supplementary Fig. S6](#): Survival of defined *S. Typhimurium* mutants lacking type I and type II TA modules in NRK-49F rat fibroblasts.

[Supplementary Table S3](#). Bacterial strains and plasmids used in this study.

[Supplementary Table S4](#). Oligonucleotides used as primers in this study.

**Supplementary Table S1.** Compiled information of the 27 TA components identified in *S. Typhimurium* strain SL1344, which includes gene orientation, functional domains of toxins and antitoxins and ortholog genes in strain LT2.

| Toxin-Antitoxin domain * | Family <sup>†</sup> | Toxin-Antitoxin gene <sup>§</sup> | Gene ID strain SL1344 | Gene ID strain LT2 | Coordinates genome <i>S.Typhimurium</i> SL1344 | Orientation (strand) |
|--------------------------|---------------------|-----------------------------------|-----------------------|--------------------|------------------------------------------------|----------------------|
| Xre-like domain          | -                   | <i>a1</i>                         | SL2379                | STM2413            | 2527069- 2527825                               | Coding               |
| Xre-like domain          | -                   | <i>t1</i>                         | SL2380                | STM2414            |                                                |                      |
| RHH-like domain          | -                   | <i>a2</i>                         | SL2884                | STM2904            | 3069908- 3070722                               | Coding               |
| GNAT-like domain         | -                   | <i>t2</i>                         | SL2885                | STM2905            |                                                |                      |
| RHH-like domain          | <i>parDE</i>        | <i>parD</i>                       | SL2936                | STM2955.S          | 3124178- 3123641                               | Complementary        |
| RelE-like domain         | <i>parDE</i>        | <i>parE</i>                       | SL2935                | STM2954.1n         |                                                |                      |
| YhfG -like domain        | -                   | <i>a3</i>                         | SL3438                | STM3471            | 3642596- 3641837                               | Complementary        |
| Fic-like domain          | -                   | <i>t3</i>                         | SL3437                | STM3470            |                                                |                      |
| RHH-like domain          | -                   | <i>a4</i>                         | SL3618                | STM3652            | 3859811- 3859051                               | Complementary        |
| GNAT-like domain         | -                   | <i>t4</i>                         | SL3617                | STM3651            |                                                |                      |
| Xre-like domain          | <i>relBE</i>        | <i>relB3</i>                      | SL3744                | STM3778            | 4000107- 4000773                               | Coding               |
| RelE-like domain         | <i>relBE</i>        | <i>relE3</i>                      | SL3743                | STM3777            |                                                |                      |
| Xre-like domain          | ( <i>higBA</i> )    | <i>sehB</i>                       | SL3976                | STM4030.S          | 4261841- 4261087                               | Complementary        |
| RelE-like domain         | <i>relBE</i>        | <i>sehA</i>                       | SL3977                | STM4031            |                                                |                      |
| Xre-like domain          | ( <i>higBA</i> )    | <i>sehC</i>                       | SL3979                | STM4032.2N         | 4263074- 4263676                               | Coding               |
| RelE-like domain         | <i>relBE</i>        | <i>sehD</i>                       | SL3980                | STM4033            |                                                |                      |
| RHH-like domain          | -                   | <i>a5</i>                         | SL4253                | STM4317            | 4583140- 4583921                               | Coding               |
| GNAT-like domain         | -                   | <i>t5</i>                         | SL4254                | STM4318            |                                                |                      |
| RHH-like domain          | -                   | <i>shpB</i>                       | SL4460                | STM4529            | 4806232- 4806808                               | Coding               |
| COG2929-like domain      | -                   | <i>shpA</i>                       | SL4459                | STM4528            |                                                |                      |
| RHH-like domain          | <i>relBE</i>        | <i>relB4</i>                      | SLP2_0003             | SLP2_0003          | 2395- 2942                                     | Complementary        |
| RelE-like domain         | <i>relBE</i>        | <i>relE4</i>                      | SLP2_0004             | SLP2_0004          |                                                |                      |
| MazF-like domain         | <i>ccd</i>          | <i>ccdB</i>                       | PSLT028               | PSLT028            | 73746- 73221                                   | Complementary        |
| RHH-like domain          | <i>ccd</i>          | <i>ccdA</i>                       | PSLT027               | PSLT027            |                                                |                      |
| RHH-like domain          | <i>relBE</i>        | <i>dinJ</i>                       | SL3484                | STM3517            | 3701753- 3701215                               | Complementary        |
| RelE-like domain         | <i>relBE</i>        | <i>yafQ</i>                       | SL3483                | STM3516            |                                                |                      |

| Toxin-Antitoxin domain *       | Family <sup>†</sup>              | Toxin-Antitoxin gene | Gene ID strain SL1344 | Gene ID strain LT2 | Coordinates genome S.Typhimurium SL1344 | Orientation (strand) |
|--------------------------------|----------------------------------|----------------------|-----------------------|--------------------|-----------------------------------------|----------------------|
| Phd-like domain                | <i>phd</i>                       | <i>phd</i>           | SL3525                | STM3559            | 3749850- 3749258                        | Complementary        |
| Fic-like domain                | <i>doc</i>                       | <i>doc</i>           | SL3524                | STM3558            |                                         |                      |
| COG5606 -like antitoxin domain | ( <i>higBA</i> )<br><i>relBE</i> | <i>higA</i>          | SL3866                | STM3906            | 4137213- 4137868                        | Coding               |
| RelE-like domain               |                                  | <i>higB</i>          | SL3867                | STM3907            |                                         |                      |
| -                              |                                  | <i>pasI</i>          | SL2658                | STM2686            | 2837522- 2836766                        | Complementary        |
| -                              |                                  | <i>pasT</i>          | SL2659                | STM2687            |                                         |                      |
| Phd-like domain                | <i>relBE</i>                     | <i>relB</i>          | SL1480                | STM1551            | 1583940- 1583418                        | Complementary        |
| RelE-like domain               |                                  | <i>relE</i>          | SL1479                | STM1550            |                                         |                      |
| RHH-like domain                | <i>relBE</i>                     | <i>relB2</i>         | SL4379                | STM4449            | 4712031- 4712547                        | Coding               |
| RelE-like domain               |                                  | <i>relE2</i>         | SL4380                | STM4450            |                                         |                      |
| AbrB -like domain              | <i>vapBC</i>                     | <i>vapB</i>          | SL3012                | STM3034            | 3216651- 3215876                        | Complementary        |
| PIN-like domain                |                                  | <i>vapC</i>          | SL3011                | STM3033            |                                         |                      |
| AbrB -like domain              | <i>vapBC</i>                     | <i>vapB2</i>         | PSLT107               | PSLT107            | 6736- 7364                              | Coding               |
| PIN-like domain                |                                  | <i>vapC2</i>         | PSLT106               | PSLT106            |                                         |                      |
| -                              | <i>hokIgef</i>                   | <i>hok-sok</i>       | -                     | -                  | 41921- 42073                            | Coding               |
| -                              | <i>ibs</i>                       | <i>ibsA-sibA</i>     | -                     | -                  | 3383044- 3383103                        | Coding               |
| -                              | <i>ibs</i>                       | <i>ibsB-sibB</i>     | -                     | -                  | 2211602- 2211658                        | Coding               |
| -                              | <i>ldrIfst</i>                   | <i>ldrA-rdIA</i>     | -                     | -                  | 3829510- 3829724                        | Complementary        |
| -                              | <i>ldrIfst</i>                   | <i>ldrB-rdIB</i>     | -                     | -                  | 466721- 466936                          | Coding               |
| -                              |                                  | <i>symER</i>         | SL4454                | STM4523            | 4798033- 4797630                        | Complementary        |
| -                              | <i>tisB</i>                      | <i>tisB-istR</i>     | -                     | -                  | 4019333- 4019842                        | Coding               |

\* Classification based on Makarova et al.<sup>1</sup> for type II modules and Fozo et al.<sup>2</sup> for type I modules.

<sup>†</sup> Those modules non-homologous to any other described TA module (at least toxins) were not included in any family (marked with "-")

<sup>§</sup> Nomenclature based on published literature, toxin-antitoxin domains and sequence homology.

**Supplementary Table S2.** Components of known TA modules used as PSI-BLAST queries

| Protein | Toxin (T)<br>Antitoxin (A) | Module<br>type | Accession no.<br>(UNIPROT) | Organism                              | Toxin activity                            |
|---------|----------------------------|----------------|----------------------------|---------------------------------------|-------------------------------------------|
| BsrG    | T                          | I              | <a href="#">L8EAY0</a>     | <i>Bacillus subtilis</i>              | Attacks bacterial membrane                |
| CcdA    | A                          | II             | <a href="#">P62552</a>     | <i>Escherichia coli</i> plasmid F     | -                                         |
| CcdB    | T                          | II             | <a href="#">P62554</a>     | <i>E. coli</i> plasmid F              | DNA gyrase inhibitor                      |
| ChpB    | T                          | II             | <a href="#">P33647</a>     | <i>E. coli</i> K-12                   | mRNA interferase                          |
| DinJ    | A                          | II             | <a href="#">Q47150</a>     | <i>E. coli</i> K-12                   | -                                         |
| YafQ    | T                          | II             | <a href="#">Q47149</a>     | <i>E. coli</i> K-12                   | -                                         |
| GhoS    | A                          | V              | <a href="#">P0AF61</a>     | <i>E. coli</i> K-12                   | mRNA interferase                          |
| GhoT    | T                          | V              | <a href="#">P64646</a>     | <i>E. coli</i> K-12                   | mRNA interferase                          |
| HicA    | T                          | II             | <a href="#">P76106</a>     | <i>E. coli</i> K-12                   | mRNA interferase                          |
| HicB    | A                          | II             | <a href="#">P67697</a>     | <i>E. coli</i> K-12                   | -                                         |
| HigA    | A                          | II             | <a href="#">P67701</a>     | <i>E. coli</i> K-12                   | -                                         |
| HigB    | T                          | II             | <a href="#">P64578</a>     | <i>E. coli</i> K-12                   | mRNA interferase                          |
| HipA    | T                          | II             | <a href="#">P23874</a>     | <i>E. coli</i> K-12                   | Serine/threonine-protein kinase           |
| HipB    | A                          | II             | <a href="#">P23873</a>     | <i>E. coli</i> K-12                   | -                                         |
| Hok     | T                          | I              | <a href="#">P11895</a>     | <i>E. coli</i> K-12 plasmid R1        | Attacks bacterial membrane                |
| IbsA    | T                          | I              | <a href="#">C1P607</a>     | <i>E. coli</i> K-12                   | Attacks bacterial membrane                |
| LdrD    | T                          | I              | <a href="#">Q6BF25</a>     | <i>E. coli</i> K-12                   | Attacks bacterial membrane                |
| LsoA    | T                          | II             | <a href="#">O82881</a>     | <i>E. coli</i> O157:H7 plasmid pOSAK1 | mRNA interferase                          |
| LsoB    | A                          | II             | <a href="#">Q7DKW4</a>     | <i>E. coli</i> O157:H7 plasmid pOSAK1 | -                                         |
| MazE    | A                          | II             | <a href="#">P0AE72</a>     | <i>E. coli</i> K-12                   | -                                         |
| MazF    | T                          | II             | <a href="#">P0AE70</a>     | <i>E. coli</i> K-12                   | mRNA interferase                          |
| MqsA    | A                          | II             | <a href="#">Q46864</a>     | <i>E. coli</i> K-12                   | -                                         |
| MqsR    | T                          | II             | <a href="#">Q46865</a>     | <i>E. coli</i> K-12                   | mRNA interferase                          |
| PezA    | A                          | II             | <a href="#">Q97QZ2</a>     | <i>Streptococcus pneumoniae</i>       |                                           |
| PezT    | T                          | II             | <a href="#">Q97QZ1</a>     | <i>Streptococcus pneumoniae</i>       | UDP-N-acetylglucosamine kinase            |
| PasT    | T                          | II             | <a href="#">P0AGL5</a>     | <i>E. coli</i> K-12                   | Inhibitor of ribosome subunit association |
| PasI    | A                          | II             | <a href="#">P52119</a>     | <i>E. coli</i> K-12                   | -                                         |
| RelB    | A                          | II             | <a href="#">P0C079</a>     | <i>E. coli</i> K-12                   | -                                         |
| RelE    | T                          | II             | <a href="#">P0C077</a>     | <i>E. coli</i> K-12                   | mRNA interferase                          |
| RnlA    | T                          | II             | <a href="#">P52129</a>     | <i>E. coli</i> K-12                   | mRNA interferase                          |
| ShoB    | T                          | I              | <a href="#">C1P611</a>     | <i>E. coli</i> K-12                   | Attacks bacterial membrane                |
| SymE    | T                          | I              |                            | <i>E. coli</i> K-12                   | mRNA interferase                          |

| Protein        | Toxin (T)<br>Antitoxin (A) | Module<br>type | Accession no.<br>(UNIPROT) | Organism                                                                                                    | Toxin activity                        |
|----------------|----------------------------|----------------|----------------------------|-------------------------------------------------------------------------------------------------------------|---------------------------------------|
| ToxN           | T                          | III            | <a href="#">B8X8Z0</a>     | <i>Pectobacterium atrosepticum</i> ( <i>Erwinia carotovora</i> subsp. <i>atroseptica</i> ) plasmid pECA1039 | mRNA interferase                      |
| YafN           | A                          | II             | <a href="#">Q47156</a>     | <i>E. coli</i> K-12                                                                                         | -                                     |
| YafO           | T                          | II             | <a href="#">Q47157</a>     | <i>E. coli</i> K-12                                                                                         | mRNA interferase                      |
| YafQ           | T                          | II             | <a href="#">Q47149</a>     | <i>E. coli</i> K-12                                                                                         | mRNA interferase                      |
| YafW           | A                          | IV             | <a href="#">Q47684</a>     | <i>E. coli</i> K-12                                                                                         | -                                     |
| YeeU           | A                          | IV             | <a href="#">P76364</a>     | <i>E. coli</i> K-12                                                                                         | -                                     |
| YeeV<br>(CbtA) | T                          | IV             | <a href="#">P64524</a>     | <i>E. coli</i> K-12                                                                                         | Inhibitor of cell<br>division         |
| YefM           | A                          | II             | <a href="#">P69346</a>     | <i>E. coli</i> K-12                                                                                         | -                                     |
| YhaV           | T                          | II             | <a href="#">P64594</a>     | <i>E. coli</i> K-12                                                                                         | mRNA interferase                      |
| Ykfl           | T                          | IV             | <a href="#">P77692</a>     | <i>E. coli</i> K-12                                                                                         | Inhibitor of cell<br>division         |
| YoeB           | T                          | II             | <a href="#">P69348</a>     | <i>E. coli</i> K-12                                                                                         | mRNA interferase                      |
| ε              | A                          | II             | <a href="#">Q57231</a>     | <i>Streptococcus pyogenes</i><br>plasmid pSM19035                                                           | -                                     |
| ς              | T                          | II             | <a href="#">Q54944</a>     | <i>S. pyogenes</i> plasmid<br>pSM19035                                                                      | UDP-N-<br>acetylglucosamine<br>kinase |

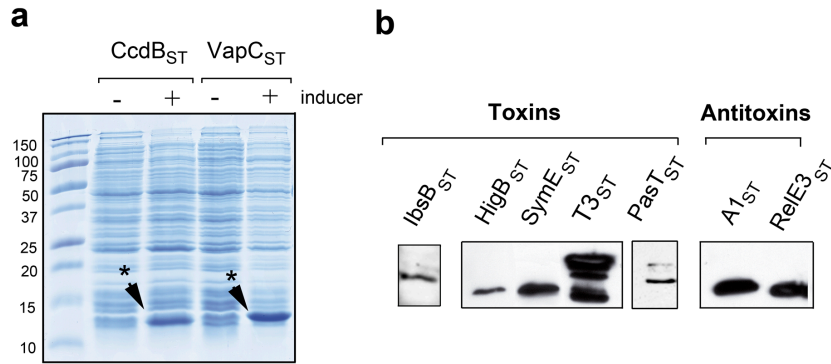

**Supplementary Fig. S1: Experimental evidence for the production of toxins and antitoxins encoded by type I and type II TA modules exhibiting no activity in functional assays.** (a) levels of the indicated toxins in response to inducer used to increase expression from the respective plasmids. Arrows indicate the presence of the toxin upon inducer addition. Molecular weight of standards are indicated in kDa; (b) levels of the indicated toxins and antitoxins detected by Western blotting in strains bearing expression plasmids in which 3xFLAG-tagged alleles of the respective genes were. Only the samples prepared in the presence of the inducer are shown.

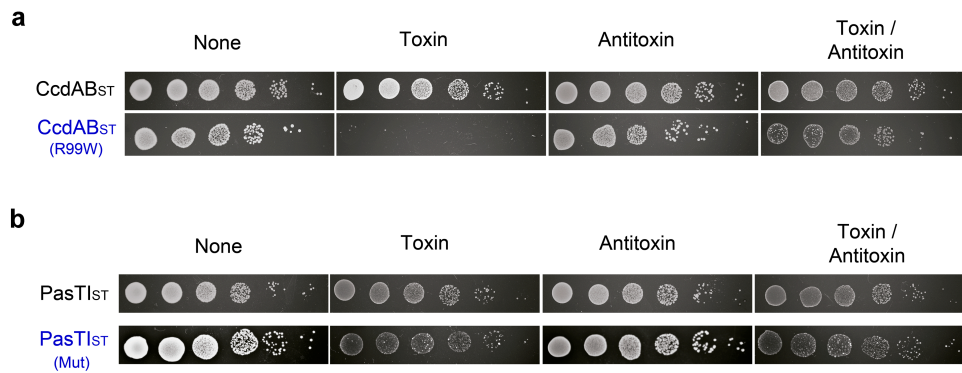

**Supplementary Fig. S2. Recovery by site directed mutagenesis of anti-proliferative activity in the non-functional toxins CcdB<sub>ST</sub> and PasT<sub>ST</sub> of *S. Typhimurium* strain SL1344.** (a) Inactive CcdB<sub>ST</sub> toxin of virulence plasmid pSLT regains full toxic activity when a key residue for gyrase-dependent toxicity is replaced by the residue present in CcdB of *E. coli* plasmid F (change R99W); (b) Inactive PasT<sub>ST</sub> of *S. Typhimurium* becomes partially toxic when its N-terminal region is replaced by the N-terminus of *E.coli* PasT toxin. Top figures in each panel (CcdAB<sub>ST</sub> and PasT<sub>ST</sub>) refer to the data shown for these two toxins in Figure 2 of main text.

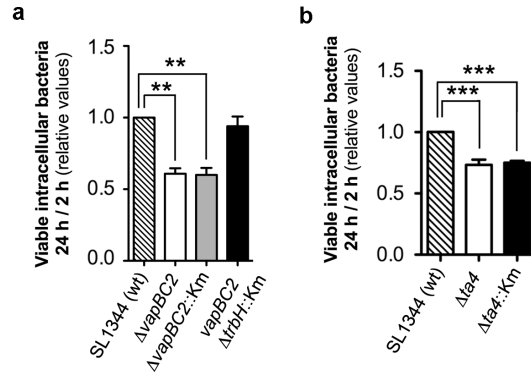

**Supplementary Fig. S3. Control experiments discard polar effects due to genetic procedure involving replacement of functional TA loci.** (a) Intracellular survival rates shown by isogenic strains defective in *vapBC2*<sub>ST</sub> carrying the Km cassette compared to the clean deletion mutant. A third mutant carrying a Km cassette in the flanking gene *trbH*, which forms part of the conjugative *tra* operon mapping in the complementary strand, was included in the assay; (b) Intracellular survival rate of the original mutant defective in *ta4*<sub>ST</sub>, which carries a Km cassette replacing the *ta4* locus compared to the clean deletion mutant. Note that the phenotype between the kanamycin-containing strains and the clean deletion mutants is undistinguishable. Data are the means and standard deviations from three independent experiments. \*\*,  $P = 0.001$  to  $0.01$ ; \*\*\*,  $P \leq 0.001$  by one-way ANOVA with Dunnett's multiple comparison post-test.

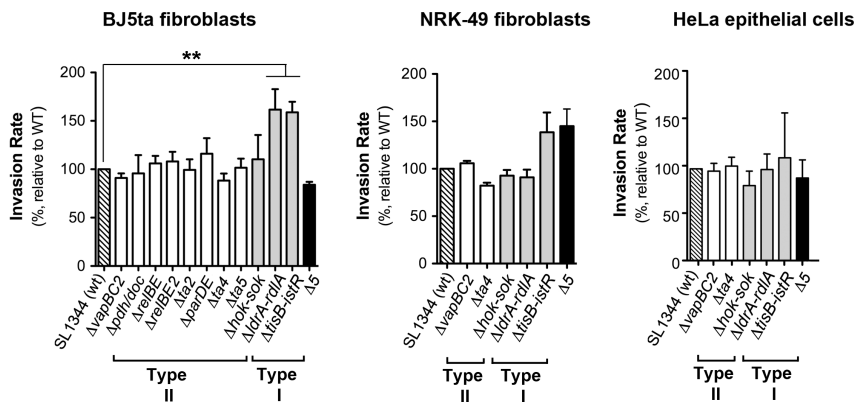

**Supplementary Fig. S4. Invasion rate of two fibroblast cell lines (BJ5ta and NRK-49F) and an epithelial cell line (HeLa) displayed by *S. Typhimurium* strains lacking bona fide TA modules.** Shown are mutants in type I (grey bars) and type II (white bars) TA modules. “ $\Delta 5$ ” refers to the  $\Delta hok-sok$ <sub>ST</sub>  $\Delta tisB-istR$ <sub>ST</sub>  $\Delta ldrA-ldrA$ <sub>ST</sub>  $\Delta ta4$ <sub>ST</sub>  $\Delta vapBC2$ <sub>ST</sub> mutant. Data are the means and standard deviations from three independent experiments. \*\*,  $P = 0.001$  to  $0.01$  by one-way ANOVA with Dunnett's multiple comparison post-test. Invasion rate is measured as the ratio of the cfu 2h post-infection compared to the cfu used to infect the different cell lines.

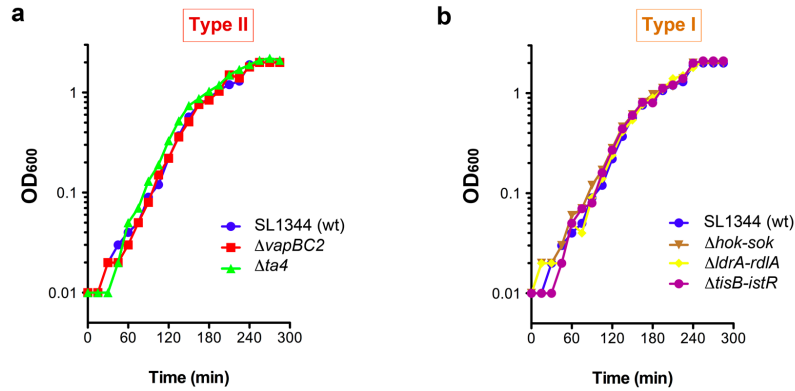

**Supplementary Fig. S5. Growth curves in LB medium of defined *S. Typhimurium* mutants lacking type I and type II TA modules required for survival inside eukaryotic cells** (see Fig.5 of main manuscript). Shown are the growth curves of parental and the indicated mutant strains in LB medium, 37°C and shaking conditions (125 rpm). (a) mutants lacking individual type II TA modules; (b) mutants lacking individual type I TA modules.

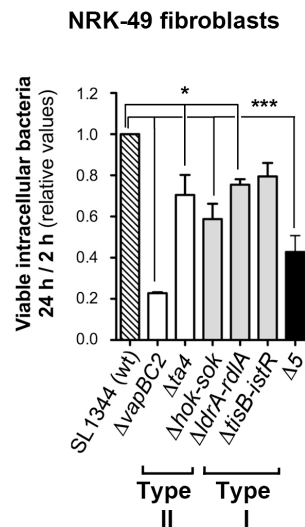

**Supplementary Fig. S6. Survival of defined *S. Typhimurium* mutants lacking type I and type II TA modules in NRK-49F rat fibroblasts.** Shown are the set of *S. Typhimurium* mutants that were tested in BJ5-ta human fibroblasts (see Fig.5 of main manuscript). Note the requirement of selected toxins of type I (grey bars) and type II (white bars) TA modules for pathogen survival. “ $\Delta 5$ ” refers to the  $\Delta hok-sok_{ST} \Delta tisB-istR_{ST} \Delta ldrA-ldrA_{ST} \Delta ta4_{ST} \Delta vapBC2_{ST}$  mutant. Data are the means and standard deviations from three independent experiments. \*,  $P = 0.1$  to  $0.05$ ; \*\*\*,  $P = 0.001$  to  $0.01$ , by  $t$ -test analysis.



**Supplementary Table S3.** Bacterial strains and plasmids used in this study

| Bacterial species / plasmid            | Strain                | Relevant genotype                                                                                          | Reference |
|----------------------------------------|-----------------------|------------------------------------------------------------------------------------------------------------|-----------|
| <i>E. coli</i><br><i>S.Typhimurium</i> | MG1655                | F-, λ-, <i>rph-1</i>                                                                                       | 3         |
|                                        | SL1344                | <i>hisG64</i> , <i>rpsL</i>                                                                                | 4         |
|                                        | SL1344-01             | <i>ta5<sub>ST</sub>::Km</i>                                                                                | This work |
|                                        | SL1344-02             | <i>phd-doc<sub>ST</sub>::Km</i>                                                                            | This work |
|                                        | SL1344-03             | <i>ta2<sub>ST</sub>::Km</i>                                                                                | This work |
|                                        | SL1344-04             | <i>parDE<sub>ST</sub>::Km</i>                                                                              | This work |
|                                        | SL1344-05             | <i>ta4<sub>ST</sub>::Km</i>                                                                                | This work |
|                                        | SL1344-06             | Δ <i>ta4<sub>ST</sub></i>                                                                                  | This work |
|                                        | SL1344-07             | <i>relBE<sub>ST</sub>::Km</i>                                                                              | This work |
|                                        | SL1344-08             | <i>vapBC2<sub>ST</sub>::Km</i>                                                                             | This work |
|                                        | SL1344-09             | Δ <i>vapBC2<sub>ST</sub></i>                                                                               | This work |
|                                        | SL1344-10             | <i>vapBC2<sub>ST</sub>/trbH::Km</i>                                                                        | This work |
|                                        | SL1344-11             | <i>hok-sok<sub>ST</sub>::Km</i>                                                                            | This work |
|                                        | SL1344-12             | <i>ldrA-rdIA<sub>ST</sub>::Km</i>                                                                          | This work |
|                                        | SL1344-13             | <i>tisB-istR<sub>ST</sub>::Km</i>                                                                          | This work |
|                                        | SL1344-14             | <i>t2<sub>ST</sub>-3xFLAG</i>                                                                              | This work |
|                                        | SL1344-15             | <i>t4<sub>ST</sub>-3xFLAG</i>                                                                              | This work |
|                                        | SL1344-16             | <i>t5<sub>ST</sub>-3xFLAG</i>                                                                              | This work |
|                                        | SL1344-17             | <i>vapC2<sub>ST</sub>-3xFLAG</i>                                                                           | This work |
|                                        | SL1344-21             | Δ <i>ta4<sub>ST</sub></i> /Δ <i>vapBC2</i> /Δ <i>hok-sok</i> /Δ <i>ldrA-rdIA</i><br>Δ <i>tisB-istR::Km</i> | This work |
| Plasmids                               | pACYC184              | <i>cat</i> , <i>tet</i>                                                                                    | 5         |
|                                        | pFUS2                 | <i>aph</i>                                                                                                 | 6         |
|                                        | pAC-P <sub>lac</sub>  | pACYC184 derived plasmid. <i>P<sub>lac</sub></i> promoter,                                                 | This work |
|                                        | pFUS-P <sub>BAD</sub> | pBR322 derived plasmid. <i>P<sub>BAD</sub></i> promoter,                                                   | This work |
|                                        | pKD267                | <i>kanamycin-parE</i> cassette                                                                             | 7         |
|                                        | pKD46                 | λRed recombinase                                                                                           | 8         |
|                                        | pSUB11                | kanamycin-3xFLAG cassette                                                                                  | 9         |
|                                        | pCP20                 | <i>bla</i> , induction of flippase synthesis by temperature                                                | 10        |

**Supplementary Table S4.** Oligonucleotides used as primers in this study

| Name        | Primer sequence (5' – 3')                        | Used for                                                    |
|-------------|--------------------------------------------------|-------------------------------------------------------------|
| T1-zra      | GCC <u>GACGTC</u> ATGAAAAGATTACGCAGTAAAATG       | Cloning toxin t1. Zra1 site underlined                      |
| T1-spe      | GCC <u>ACTAGT</u> TTAGTCCGCCTCATTGATACCTAAACG    | Cloning toxin t1. SpeI site underlined                      |
| A1-zra      | GCC <u>GACGTC</u> ATGTTCAAGGAACGGATGACGCCAGAAG   | Cloning antitoxin a1. Zra1 site underlined                  |
| A1-spe      | GCC <u>ACTAGT</u> TTATTTGCTATCGCGTATCCCTAAGCGTTG | Cloning antitoxin a1. SpeI site underlined                  |
| T2-zra      | GCC <u>GACGTC</u> ATGATGTTTACAGACTGGCATGAG       | Cloning t2 toxin. Zra1 site underlined                      |
| T2-spe      | GCG <u>ACTAGT</u> GTCATAACCTACCAGATGCAGATAAAG    | Cloning t2 toxin. SpeI site underlined                      |
| A2-zra      | GCC <u>GACGTC</u> ATGAAAACCATGCCTCAGATAGC        | Cloning a2 antitoxin. Zra1 site underlined                  |
| A2-spe      | GCG <u>ACTAGT</u> CCAGTCTGTAAACATCATTCTTC        | Cloning a2 antitoxin. SpeI site underlined                  |
| ParE-zra    | GCC <u>GACGTC</u> ATGGTAAAATTAACGCCAAAG          | Cloning <i>parE</i> toxin. Zra1 site underlined             |
| ParE-spe    | GCC <u>ACTAGT</u> CTATAACCAATTTACATGCTTAC        | Cloning <i>parE</i> toxin. SpeI site underlined             |
| ParD-zra    | GCC <u>GACGTC</u> ATGACCGTTGATCTTGCGATGAA        | Cloning <i>parD</i> antitoxin. Zra1 site underlined         |
| ParD-spe    | GCC <u>ACTAGT</u> TCACTGGCCTTTGGCGTTAATTTTACC    | Cloning <i>parD</i> antitoxin. SpeI site underlined         |
| T3-zra      | GCC <u>GACGTC</u> ATGAGCGATAAATTTGGCGAAGG        | Cloning t3 toxin. Zra1 site underlined                      |
| T3-spe      | GCC <u>ACTAGT</u> TTACTCAGTTTCGCGAGCTTCGCTTATC   | Cloning t3 toxin. SpeI site underlined                      |
| A3-zra      | GCC <u>GACGTC</u> GTGAAGAACTTACCGATAAACAAAAGTC   | Cloning a3 antitoxin. Zra1 site underlined                  |
| A3-spe      | GCC <u>ACTAGT</u> ATTTATCGCTCATAGTGCCTCCGAAG     | Cloning a3 antitoxin. SpeI site underlined                  |
| T4-zra      | GGA <u>GACGTC</u> GTGGGACGTGTAACAGCACCAGAACCTTTG | Cloning t4 toxin. Zra1 site underlined                      |
| T4-spe      | GGC <u>ACTAGT</u> CTATTGAGGGAGCCTAAGGAACAATGTTC  | Cloning t4 toxin. SpeI site underlined                      |
| A4-zra      | GGC <u>GACGTC</u> ATGCTATACAAGGGGTGTCTCATGAAATC  | Cloning a4 antitoxin. Zra1 site underlined                  |
| A4-spe      | GGC <u>ACTAGT</u> TTACACGTCCCCTGAGGTTTC          | Cloning a4 antitoxin. SpeI site underlined                  |
| RelE3-zra   | GGC <u>GACGTC</u> ATGCGAACCTTCAAACCAGGTG         | Cloning <i>relE3</i> toxin. Zra1 site underlined            |
| RelE3.2-zra | GCG <u>GACGTC</u> GTGTATCACCTGGTGTATAC           | Cloning <i>relE3</i> N-extended toxin. Zra1 site underlined |

|            |                                                   |                                                      |
|------------|---------------------------------------------------|------------------------------------------------------|
| RelE3-spe  | GGC <u>ACTAGT</u> TAGTTTTTGCTGACATGGCGCACCTCTAC   | Cloning <i>relE3</i> toxin. SpeI site underlined     |
| RelB3-zra  | GGC <u>GACGTC</u> ATGTCAGCAAAAATAAATTC            | Cloning <i>relB3</i> antitoxin. ZraI site underlined |
| RelB3-spe  | GCC <u>ACTAGT</u> CATACCAGCACCTTTAGC              | Cloning <i>relB3</i> antitoxin. SpeI site underlined |
| SehA-zra   | GCT <u>GACGTC</u> GTGCATGTTATCAGCCGAAAACC         | Cloning <i>sehA</i> toxin. ZraI site underlined      |
| SehA -spe  | GCC <u>ACTAGT</u> TCATTCTTTATTACCCCGATAGTATGC     | Cloning <i>sehA</i> toxin. SpeI site underlined      |
| SehB -zra  | GGC <u>GACGTC</u> ATGGATGCAACCAGCGCAAAAAGATCGTTG  | Cloning <i>sehB</i> antitoxin. ZraI site underlined  |
| SehB -spe  | GGC <u>ACTAGT</u> CTACTCGATGAAGGCATCTGCTGGTAGTTTG | Cloning <i>sehB</i> antitoxin. SpeI site underlined  |
| SehD -zra  | GCC <u>GACGTC</u> ATGCAATTTATAGAAACGGAAC          | Cloning <i>sehD</i> toxin. ZraI site underlined      |
| SehD-spe   | GCC <u>ACTAGT</u> CTACCACCTCTCATTTCAGCATAC        | Cloning <i>sehD</i> toxin. SpeI site underlined      |
| SehC -zra  | GCC <u>GACGTC</u> ATGGATAAAGTGTTATTTGAGCGATTAAC   | Cloning <i>sehC</i> antitoxin. ZraI site underlined  |
| SehC-spe   | GCC <u>ACTAGT</u> TCAATAACGCAATGCTTGATAACGTTTC    | Cloning <i>sehC</i> antitoxin. SpeI site underlined  |
| T5-zra     | GCC <u>GACGTC</u> ATGATCTCCACCCCTGAG              | Cloning <i>t5</i> toxin. ZraI site underlined        |
| T5-spe     | GCC <u>ACTAGT</u> GATGCGTTCTGGAGTTTAAC            | Cloning <i>t5</i> toxin. SpeI site underlined        |
| A5-zra     | GCC <u>GACGTC</u> ATGCCAGCCGCAAACAGTATG           | Cloning <i>a5</i> antitoxin. ZraI site underlined    |
| A5-spe     | GCC <u>ACTAGT</u> CTCAGGGGTGGAGATCATTTTTCC        | Cloning <i>a5</i> antitoxin. SpeI site underlined    |
| ShpA-zra   | GCC <u>GACGTC</u> ATGCCGATGGAGTTTGAATGGGATGC      | Cloning <i>shpA</i> toxin. ZraI site underlined      |
| ShpA-spe   | GCC <u>ACTAGT</u> TTAACCATGCTCATAACGATTCCTCTC     | Cloning <i>shpA</i> toxin. SpeI site underlined      |
| ShpB-zra   | GCC <u>GACGTC</u> ATGAGCATGGTTAAACATAAAC          | Cloning <i>shpB</i> antitoxin. ZraI site underlined  |
| ShpB-spe   | GCC <u>ACTAGT</u> CGGGCTATTTCTTATTTTGCTC          | Cloning <i>shpB</i> antitoxin. SpeI site underlined  |
| RelE4-zra  | GCC <u>GACGTC</u> ATGATGGAGATATTCTGGACCATG        | Cloning <i>relE4</i> toxin. ZraI site underlined     |
| RelE4-spe  | GCC <u>ACTAGT</u> CTATGGCCAATTCTGTGCAGTATG        | Cloning <i>relE4</i> toxin. SpeI site underlined     |
| RelB4-spe  | GCC <u>ACTAGT</u> ATGGCACAGGTTAATATGAGTTTAAG      | Cloning <i>relB4</i> antitoxin. SpeI site underlined |
| RelB4-spe2 | GCC <u>ACTAGT</u> TCATTTACCGGCAACCTTCC            | Cloning <i>relB4</i> antitoxin. SpeI site underlined |
| CcdB-zra   | GCC <u>GACGTC</u> ATGCAGTTTAAGTTTACAC             | Cloning <i>ccdB</i> toxin. ZraI site underlined      |
| CcdB-spe   | GCC <u>ACTAGT</u> TCAGATCCCCCGAACATC              | Cloning <i>ccdB</i> toxin. SpeI site underlined      |

|            |                                                     |                                                                               |
|------------|-----------------------------------------------------|-------------------------------------------------------------------------------|
| CcdB-mut-5 | CCATTAACCTGATGTTCT <u>GGGGG</u> GATCTGAACTAG        | Introduction mutation R99W in <i>ccdB</i> . Nucleotide changed is underlined. |
| CcdB-mut-3 | CTAGTTCAGATCCCC <u>A</u> GAACATCAGGTTAATGG          | Introduction mutation R99W in <i>ccdB</i> . Nucleotide changed is underlined. |
| CcdA-zra   | GCC <u>GACGTC</u> ATGAAGCAGCGAATTACAGTGACAG         | Cloning <i>ccdA</i> antitoxin. ZraI site underlined                           |
| CcdA-spe   | GCC <u>ACTAGT</u> TCACCAGTTCCTGTTGTCGTCAGCAAAC      | Cloning <i>ccdA</i> antitoxin. SpeI site underlined                           |
| DinJ-zra   | GCC <u>GACGTC</u> ATGGCTGCAAATGCGCTTG               | Cloning <i>dinJ</i> antitoxin. ZraI site underlined                           |
| DinJ-spe   | GCC <u>ACTAGT</u> TCAGATCCCTAACTGGTCAAACAAATC       | Cloning <i>dinJ</i> antitoxin. SpeI site underlined                           |
| YafQ-zra   | GCC <u>GACGTC</u> ATGGGGCAAAGGGAAATTGAATATTC        | Cloning <i>yafQ</i> toxin. ZraI site underlined                               |
| YafQ-spe   | GCC <u>ACTAGT</u> TTAAAATAAATCGGCATGCGTTCCTGTTGTTTC | Cloning <i>yafQ</i> toxin. SpeI site underlined                               |
| IbsA-zra   | GCC <u>GACGTC</u> ATGATGCACCAGGTCATCATAC            | Cloning <i>ibsA</i> toxin. ZraI site underlined                               |
| IbsA-spe   | GCC <u>ACTAGT</u> CCTCTGATTGTCTGTTAGTAAG            | Cloning <i>ibsA</i> toxin. SpeI site underlined                               |
| IbsB-zra   | GCC <u>GACGTC</u> ATGTGGCTTAACGTCAGGAGTGAGGGTAAG    | Cloning <i>ibsB</i> toxin. ZraI site underlined                               |
| IbsB-spe   | GCC <u>ACTAGT</u> TGATTAGCCTACCAGCTTACTAAGACAC      | Cloning <i>ibsB</i> toxin. SpeI site underlined                               |
| HigB-zra   | GCG <u>GACGTC</u> GTGGGATCTTCTCTGGAGGATC            | Cloning <i>higB</i> toxin. ZraI site underlined                               |
| HigB-spe   | GCC <u>ACTAGT</u> TCACAAGCTGTTTCTCCGTTGTTGC         | Cloning <i>higB</i> toxin. SpeI site underlined                               |
| HigA-zra   | GCG <u>GACGTC</u> GTGATTGCCAAAAGTATAG               | Cloning <i>higA</i> antitoxin. ZraI site underlined                           |
| HigA-spe   | GCC <u>ACTAGT</u> TTACGGCCCTACCATTACC               | Cloning <i>higA</i> antitoxin. SpeI site underlined                           |
| Hok-zra    | GCC <u>GACGTC</u> ATGCCACAGCGAACGTTTTTAATG          | Cloning <i>hok</i> toxin. ZraI site underlined                                |
| Hok-spe    | GCC <u>ACTAGT</u> TTAACGTTTAACTTCGTAGGCTAAC         | Cloning <i>hok</i> toxin. SpeI site underlined                                |
| Doc-zra    | GCC <u>GACGTC</u> ATGACCCTACAACCTATCTCAG            | Cloning <i>doc</i> toxin. ZraI site underlined                                |
| Doc-spe    | GTA <u>ACTAGT</u> CCGGGATTAACGTCTCAGG               | Cloning <i>doc</i> toxin. SpeI site underlined                                |
| Phd-zra    | GGCC <u>GACGTC</u> ATGTTTATGCGTACGGTTAACTATAGCG     | Cloning <i>phd</i> antitoxin. ZraI site underlined                            |
| Phd-spe    | GGT <u>ACTAGT</u> GGTCATTTATCCGCCAGCTCCCTGAG        | Cloning <i>phd</i> antitoxin. SpeI site underlined                            |
| LdrA-zra   | GCC <u>GACGTC</u> ATGACGCTTACGCAGTTGGGCGTGGTCTTCTG  | Cloning <i>ldrA</i> toxin. ZraI site underlined                               |
| LdrA-spe   | GCC <u>ACTAGT</u> TACTTCCTGTACGTAGCCAGTTGACGATC     | Cloning <i>ldrA</i> toxin. SpeI site underlined                               |

|              |                                                           |                                                      |
|--------------|-----------------------------------------------------------|------------------------------------------------------|
| LdrB-zra     | GCC <u>GACGTC</u> ATGACGCTCACAGAGTTGAGCATTACTATC          | Cloning <i>ldrB</i> toxin. ZraI site underlined      |
| LdrB-spe     | GCC <u>ACTAGT</u> CGCCCACTTCACACTTCCG                     | Cloning <i>ldrB</i> toxin. SpeI site underlined      |
| PasT-zra     | GCG <u>GACGTC</u> GTGGTATTATTTACACGATTTATGTTG             | Cloning <i>pasT</i> toxin. ZraI site underlined      |
| PasT-spe     | GCC <u>ACTAGT</u> TTATCCGGCACGGTAAACCTCTTTG               | Cloning <i>pasT</i> toxin. SpeI site underlined      |
| PasT-mut-zra | <u>GACGTC</u> ATGATATTATTTGTAGGATTTCTGTTGATGGGAATTGCTATGC | Introduction N-terminal mutation in <i>pasT</i> .    |
| PasI-zra     | GCG <u>GACGTC</u> GTGCCGATAAACTTGTGGTTG                   | Cloning <i>pasI</i> antitoxin. ZraI site underlined  |
| PasI-spe     | GCG <u>ACTAGT</u> AAAAGAGGCTAATTATCTACCAG                 | Cloning <i>pasI</i> toxin. SpeI site underlined      |
| RelE-zra     | GCC <u>GACGTC</u> ATGACTTATAAGCTGGCATTTAACG               | Cloning <i>relE</i> toxin. ZraI site underlined      |
| RelE-spe     | GCC <u>ACTAGT</u> TTAGCTTCTGTGTCGTGTCATTTTG               | Cloning <i>relE</i> toxin. SpeI site underlined      |
| RelB-zra     | GCC <u>GACGTC</u> ATGGCATTTCAAATTTAACGACTAC               | Cloning <i>relB</i> antitoxin. ZraI site underlined  |
| RelB-spe     | GCC <u>ACTAGT</u> TTATAAGTCATCAATGTTGACCTCAATG            | Cloning <i>relB</i> antitoxin. SpeI site underlined  |
| RelE2-zra    | GCC <u>GACGTC</u> ATGACTTATGAACTGGAATTCG                  | Cloning <i>relE2</i> toxin. ZraI site underlined     |
| RelE2-spe    | GCC <u>ACTAGT</u> ATCGCTAAAGCCGTTTGTTTG                   | Cloning <i>relE2</i> toxin. SpeI site underlined     |
| RelB2-zra    | GCC <u>GACGTC</u> ATGGCCACGCTGAACGTCCGTCTGGATGACAAACTC    | Cloning <i>relB2</i> antitoxin. ZraI site underlined |
| RelB2-spe    | GCC <u>ACTAGT</u> TCATAAGTCATCCAGACTAACCTTGATTC           | Cloning <i>relB2</i> antitoxin. SpeI site underlined |
| SymE-zra     | GCC <u>GACGTC</u> ATGACTACCGTCCATTCTATTG                  | Cloning <i>symE</i> toxin. ZraI site underlined      |
| SymE-spe     | GCC <u>ACTAGT</u> ATTTTATGCGTTTACTTAGAACCTG               | Cloning <i>symE</i> toxin. SpeI site underlined      |
| TisB-zra     | GCC <u>GACGTC</u> ATGAGCGTAGTGGATATCACCATTC               | Cloning <i>tisB</i> toxin. ZraI site underlined      |
| TisB-spe     | GCG <u>ACTAGT</u> GGCTTGAATCTGAATTAAGG                    | Cloning <i>tisB</i> toxin. SpeI site underlined      |
| VapC-zra     | GCC <u>GACGTC</u> ATGCTGAAATTCATGCTTGATAC                 | Cloning <i>vapC</i> toxin. ZraI site underlined      |
| VapC-spe     | GCC <u>ACTAGT</u> TTAGCACCAGTCTTCGATTCGGATACC             | Cloning <i>vapC</i> toxin. SpeI site underlined      |
| VapB-zra     | GCC <u>GACGTC</u> ATGTATTCAGAAATGCCGGAGTCGGAC             | Cloning <i>vapB</i> antitoxin. ZraI site underlined  |
| VapB-spe     | GCC <u>ACTAGT</u> TCAAATCCTTCCCGTTCCTGTACTG               | Cloning <i>vapB</i> antitoxin. SpeI site underlined  |
| VapC2-zra    | GCC <u>GACGTC</u> ATGCTGAAGTTTATGCTGGATACTAAC             | Cloning <i>vapC2</i> toxin. ZraI site underlined     |
| VapC2-spe    | GCC <u>ACTAGT</u> TCAGCTCCAGTCCTCAGTTCTCAG                | Cloning <i>vapC2</i> toxin. SpeI site underlined     |
| VapB2-zra    | GCC <u>GACGTC</u> ATGATGGAAACCAGCGTATTTCTC                | Cloning <i>vapB2</i> antitoxin. ZraI site underlined |

|                |                                                                                |                                                                              |
|----------------|--------------------------------------------------------------------------------|------------------------------------------------------------------------------|
| VapB2-spe      | GCC <u>ACTAGT</u> TCAGAATGATTCCCGTTCCTG                                        | Cloning <i>vapB2</i> antitoxin. Spel site underlined                         |
| Fw-del-Phd-Doc | GCGAACGAAGCGGTGCGCAGCGCCTATCTGGGCGGTTAGACTGTGCCAG<br>GTCTCTACGCCGGACGCATCGTG   | Amplification <i>km-parE</i> cassette from pKD267 to delete <i>phd-doc</i> . |
| Rv-del-Phd-Doc | CGGCGCACATGCCGTAACCCAACCAGGCGGAGCGTCGCCGGGATTAACG<br>TCACTGATCAGTGATAAGCTGTC   | Amplification <i>km-parE</i> cassette from pKD267 to delete <i>phd-doc</i> . |
| Fw-del-TA2     | GCCTGGACTATATCAGCCTCATATGTACGCCTTCAAAGCGTACAGATATG<br>TCTCTACGCCGGACGCATCGTG   | Amplification <i>km-parE</i> cassette from pKD267 to delete <i>ta2</i> .     |
| Rv-del-TA2     | CCTGTATCCTTATCGTTGGCCGATTCTGAATTATTCAACAAAGCCTCATGT<br>TGACTGATCAGTGATAAGCTGTC | Amplification <i>km-parE</i> cassette from pKD267 to delete <i>ta2</i> .     |
| Fw-del-ParDE   | GGCTCAGAATACGTATCACGATAACTTCCGTAAGTATTGTATAAAATAGT<br>CTCTACGCCGGACGCATCGTG    | Amplification <i>km-parE</i> cassette from pKD267 to delete <i>parDE</i> .   |
| Rv-del- ParDE  | CCGGTGTACTCTTATGTAAGATTTATACTTACAGTGGAGGCTGTTATGGCC<br>ACTGATCAGTGATAAGCTGTC   | Amplification <i>km-parE</i> cassette from pKD267 to delete <i>parDE</i> .   |
| Fw-del-TA4     | GACATTCTATCAAATTATCGCTTATAGCGATTTGAACATAACAGTCTTTGTC<br>TCTACGCCGGACGCATCGTG   | Amplification <i>km-parE</i> cassette from pKD267 to delete <i>ta4</i> .     |
| Rv-del-TA4     | CCGCTTCTGGCACAAAGCGAACATCAGTATTCAAAAAATGAAAAACGACG<br>AACTGATCAGTGATAAGCTGTC   | Amplification <i>km-parE</i> cassette from pKD267 to delete <i>ta4</i> .     |
| TA4-5.1        | CAGTAAAGGCGCTGTCATCGTACAAAAAG                                                  | Amplification <i>ta4</i> upstream region                                     |
| TA4-3.1        | GCCCTCGAGCAAAGACTGTTATGTTCAAATCG                                               | Amplification <i>ta4</i> upstream region                                     |
| TA4-5.2        | GCCCTCGAGTCGTCGTTTTTTCATTTTTTGAATACTG                                          | Amplification <i>ta4</i> downstream region                                   |
| TA4-3.2        | GCGAGGAACGGACGCCCTATTTAC                                                       | Amplification <i>ta4</i> downstream region                                   |
| Fw-del-TA5     | GACATCTGCGTTACGCGTGTGTTGATGCTTAATATCCACAGAAGTACAAGA<br>GTCTCTACGCCGGACGCATCGTG | Amplification <i>km-parE</i> cassette from pKD267 to delete <i>ta5</i> .     |
| Rv-del-TA5     | TTAAACTCTCCACCAAATCCCCAACGTCACCATCAACATCATCGGATC<br>ACTGATCAGTGATAAGCTGTC      | Amplification <i>km-parE</i> cassette from pKD267 to delete <i>ta5</i> .     |

|               |                                                                               |                                                                                |
|---------------|-------------------------------------------------------------------------------|--------------------------------------------------------------------------------|
| Fw-del-RelBE  | GAGCCTGTTTGTCTATCGTTTGACGGGAAAGAGAGCATTTTCTGAGTGA<br>TCTCTACGCCGGACGCATCGTG   | Amplification <i>km-parE</i> cassette from pKD267 to delete <i>relBE</i> .     |
| Rv-del-RelBE  | CCGGTTTCAGTGGTCATAAGTTAGGTTCTGGACATCTGAAATTAGCCTTG<br>ACTGATCAGTGATAAGCTGTC   | Amplification <i>km-parE</i> cassette from pKD267 to delete <i>relBE</i> .     |
| Fw-del-VapBC2 | TAACCGGCGGCACTTCCC GCCGACCGGACCTGCGCAATACTCATCATAA<br>ATCTCTACGCCGGACGCATCGTG | Amplification <i>km-parE</i> cassette from pKD267 to delete <i>vapBC2</i> .    |
| Rv-del-VapBC2 | CTGATACCGCCATCAGAAATCATCTCCCGGCTCCGGTTCATCCTTTCCGT<br>ACTGATCAGTGATAAGCTGTC   | Amplification <i>km-parE</i> cassette from pKD267 to delete <i>vapBC2</i> .    |
| VapBC2-5.1    | CCGTTTTGCCACCTTATCGCTGCTC                                                     | Amplification <i>vapBC2</i> upstream region                                    |
| VapBC2-3.1    | GGAGATGATTTCTGATGGCGGTATCAGTTTATGATGAGTATTGCGCAGG<br>TCCGGTC                  | Amplification <i>vapBC2</i> upstream region                                    |
| VapBC2-5.2    | GGACCTGCGCAATACTCATCATAAACTGATACCGCCATCAGAAATCATCT<br>C                       | Amplification <i>vapBC2</i> downstream region                                  |
| VapBC2-3.2    | GCTGGCCCTGAAATACCAGGAAC                                                       | Amplification <i>vapBC2</i> downstream region                                  |
| Fw-del-TisB   | CGGGATTGATGATCACGCATTTACAATGCCGAAAACAAAAACCTCG<br>CTCTCTACGCCGGACGCATCGTG     | Amplification <i>km-parE</i> cassette from pKD267 to delete <i>tisB-istR</i> . |
| Rv-del-TisB   | CCCTTCGGTGCGGCTTGAATCTGAATTACTTAAGGTATTTCAGAACAGCA<br>ACTGATCAGTGATAAGCTGTC   | Amplification <i>km-parE</i> cassette from pKD267 to delete <i>tisB-istR</i> . |
| Fw-del-LdrA   | ACGCGTTACTTCCTGTACGTAGCCAGTTGACGATCACACTGGCGATAA<br>TTCTCTACGCCGGACGCATCGTG   | Amplification <i>km-parE</i> cassette from pKD267 to delete <i>ldrA-rdIA</i> . |
| Rv-del- LdrA  | CAGCAAGCCGGGTTTACCCGGTGAGGCGCAATGTTGCGGGGGTTTGAT<br>CCTACTGATCAGTGATAAGCTGTC  | Amplification <i>km-parE</i> cassette from pKD267 to delete <i>ldrA-rdIA</i> . |
| LdrA-5.1      | CCGGGCGTAAGGTGATGGTAG                                                         | Amplification <i>ldrA-rdIA</i> upstream region                                 |
| LdrA-3.1      | AATGTTGCGGGGGTTTGATCCATTATCGCCAGTGTGATCGTCAACT                                | Amplification <i>ldrA-rdIA</i> upstream region                                 |
| LdrA-5.2      | AGTTGACGATCACACTGGCGATAATGGATCAAACCCCGCAACATT                                 | Amplification <i>ldrA-rdIA</i> downstream region                               |
| LdrA-3.2      | CCAGGCTATAGTGCCTTGATACC                                                       | Amplification <i>ldrA-rdIA</i> downstream region                               |

|              |                                                                                   |                                                                              |
|--------------|-----------------------------------------------------------------------------------|------------------------------------------------------------------------------|
| Fw-del-Hok   | TAATGCCTAGACAACATTATAGTAGCCCGATAACCGCCGTAAGGCAATGT<br>CTCTACGCCGGACGCATCGTG       | Amplification <i>km-parE</i> cassette from pKD267 to delete <i>hok-sok</i> . |
| Rv-del-Hok   | AAACAATACCGGATACGCTTCATTGAAGAAGAAAGGGCGCAATGAGGTC<br>AACTGATCAGTGATAAGCTGTC       | Amplification <i>km-parE</i> cassette from pKD267 to delete <i>hok-sok</i> . |
| Hok-5.1      | GCTTATGTTGGCGGCGTTGTTAC                                                           | Amplification <i>hok-sok</i> upstream region                                 |
| Hok-3.1      | GAAGAAAGGGCGCAATGAGGTCACATTGCCTTACGGCGGTTATCG                                     | Amplification <i>hok-sok</i> upstream region                                 |
| Hok-5.2      | CGATAACCGCCGTAAGGCAATGTGACCTCATTGCGCCCTTTCTTC                                     | Amplification <i>hok-sok</i> downstream region                               |
| Hok-3.2      | GCTGACATGCCGAGTATACAC                                                             | Amplification <i>hok-sok</i> downstream region                               |
| Fw-tag-VapC2 | ACACCCGGGAGTTTGAACGTGTGGGTGGACTGAGAACTGAGGACTGGA<br>GCGACTACAAAGACCATGACGGTG      | Amplification <i>km-3xFLAG</i> cassette from pSUB11 to tag VapC2.            |
| Rv-tag-VapC2 | CGGAAAGGATGAACCGGAGCCGGGAGATGATTTCTGATGGCGGTATCA<br>GCATATGAATATCCTCCTTAGTTCC     | Amplification <i>km-3xFLAG</i> cassette from pSUB11 to tag VapC2.            |
| Fw-tag-T2    | GTTGCTGTCGTTTAAAACGCTTTATGCTGCTTTATCTGCATCTGGTAGGT<br>TAGACTACAAAGACCATGACGGTG    | Amplification <i>km-3xFLAG</i> cassette from pSUB11 to tag T2.               |
| Rv-tag-T2    | GTATCCTTATCGTTGGCCGATTCTGAATTATTCAACAAAGCCTCATGTTG<br>TCACATATGAATATCCTCCTTAGTTCC | Amplification <i>km-3xFLAG</i> cassette from pSUB11 to tag T2.               |
| Fw-tag-T4    | TCAAATCATCACAAACTCAGCAGCGAACATTGTTCCCTTAGGCTCCCTCAA<br>GACTACAAAGACCATGACGGTG     | Amplification <i>km-3xFLAG</i> cassette from pSUB11 to tag T4.               |
| Rv-tag-T4    | TTCTATCAAATTATCGCTTATAGCGATTTGAACATAACAGTCTTTGCATTC<br>TACATATGAATATCCTCCTTAGTTCC | Amplification <i>km-3xFLAG</i> cassette from pSUB11 to tag T4.               |
| Fw-tag-T5    | GGATCCGATGATGTTGATGGTGACGTTGGGGGATTTGGTGGAGAGTGTT<br>GACTACAAAGACCATGACGGTG       | Amplification <i>km-3xFLAG</i> cassette from pSUB11 to tag T5.               |
| Rv-tag-T5    | CACAGCGAATCCGGCCATCAGAAGCTAAGGGATGCGTTCTGGAGTTTA<br>CATATGAATATCCTCCTTAGTTCC      | Amplification <i>km-3xFLAG</i> cassette from pSUB11 to tag T5.               |
| pFUS-sec     | CTGTATCAGGCTGAAAATCTTCTCTC                                                        | Sequencing of cloned toxin/antitoxin gene                                    |
| pAC-sec      | CATAATGGGGAAGGCCATCCAG                                                            | Sequencing of cloned toxin/antitoxin gene                                    |



|         |                          |         |
|---------|--------------------------|---------|
| hok Fw  | GTCTGGATGGTGAGGGATTCTG   | RT-qPCR |
| hok Rv  | CAAGCACTGTGTTTCCCTGC     | RT-qPCR |
| ibsA Fw | GCACCAGGTCATCATAC        | RT-qPCR |
| ibsA Rv | GCTGCGAAACTTATC          | RT-qPCR |
| ldrA Fw | GGGCGTGGTCTTCTGGCACG     | RT-qPCR |
| ldrA Rv | TTACTTCCTGTCACGTAGCC     | RT-qPCR |
| ldrB Fw | TTGAGCATTACTATCTGGCACGAT | RT-qPCR |
| ldrB Rv | AAAAACAGACCTGTCGCAATCC   | RT-qPCR |
| tisB Fw | GCGTAGTGGATATCACCAT      | RT-qPCR |
| tisB Rv | TTAAGGTATTTCAGAACAGC     | RT-qPCR |

---

## References

1. Makarova KS, Wolf YI, Koonin EV. Comprehensive comparative-genomic analysis of Type 2 toxin-antitoxin systems and related mobile stress response systems in prokaryotes. *Biology direct* **4**, 19 (2009).
2. Fozo EM, Makarova KS, Shabalina SA, Yutin N, Koonin EV, Storz G. Abundance of type I toxin-antitoxin systems in bacteria: searches for new candidates and discovery of novel families. *Nucleic Acids Res.* **38**, 3743-3759 (2010).
3. Blattner FR, *et al.* The complete genome sequence of *Escherichia coli* K-12. *Science* **277**, 1453-1462 (1997).
4. Hoiseth SK, Stocker BA. Aromatic-dependent *Salmonella typhimurium* are non-virulent and effective as live vaccines. *Nature* **291**, 238-239 (1981).
5. Chang AC, Cohen SN. Construction and characterization of amplifiable multicopy DNA cloning vehicles derived from the P15A cryptic miniplasmid. *J. Bacteriol.* **134**, 1141-1156 (1978).
6. Lemonnier M, Lane D. Expression of the second lysine decarboxylase gene of *Escherichia coli*. *Microbiology* **144**, 10 (1998).
7. Maisonneuve E, Shakespeare LJ, Jorgensen MG, Gerdes K. Bacterial persistence by RNA endonucleases. *Proc Natl Acad Sci U S A* **108**, 13206-13211 (2011).
8. Datsenko KA, Wanner BL. One-step inactivation of chromosomal genes in *Escherichia coli* K-12 using PCR products. *Proc Natl Acad Sci U S A* **97**, 6640-6645 (2000).
9. Uzzau S, Figueroa-Bossi N, Rubino S, Bossi L. Epitope tagging of chromosomal genes in *Salmonella*. *Proc. Natl. Acad. Sci. U S A* **98**, 15264-15269 (2001).
10. Cherepanov PP, Wackernagel W. Gene disruption in *Escherichia coli*: TcR and KmR cassettes with the option of Flp-catalyzed excision of the antibiotic-resistance determinant. *Gene* **158**, 9-14 (1995).
